# Supplementary material for: It Is High Time to Increase Elite Soccer Substitutions Permanently
Source: Preprints.org preprint supplement (doi:10.20944/preprints202009.0028.v1), 2020-09-02
Supplement: Supplementary file 1 [file supplementary]

Top four teams to obtain the number of games per season (2018-2019), international, men, elite of each sport.

| **soccer** | **futsal** | **basketball** | **handball** |
| --- | --- | --- | --- |
| Liverpool | Magnus | CSKA Moscow | Vardar Skopje (50) |
| Tottenham Hotspur | Sporting Lisboa | Real Madrid | Barcelona Lassa (53) |
| Flamengo | Corinthians | Barcelona Lassa | MVM Veszprém (51) |
| River Plate | Barcelona | Anadolu Efes | Vive Targi Kielce (52) |

a) soccer - the best of Europe UEFA Champions League and South America Libertadores; b) futsal – the top four on the last World Intercontinental Futsal Cupfutsal. The information from Boca Juniors (from Argentina) was not found, so data from Sporting Lisboa (2018-2019 champion of the UEFA Futsal Champions League) was used; c) basketball – top teams of UEFA Basketball League; d) handball – top teams of the European Handball Federation.
